# Supplementary material
Source: PubMed Central journal article supplement (PMC3082100)
Supplement: tjp0589-1409-SD1.pdf [file tjp0589-1409-SD1.pdf]

## Supplemental figure 1

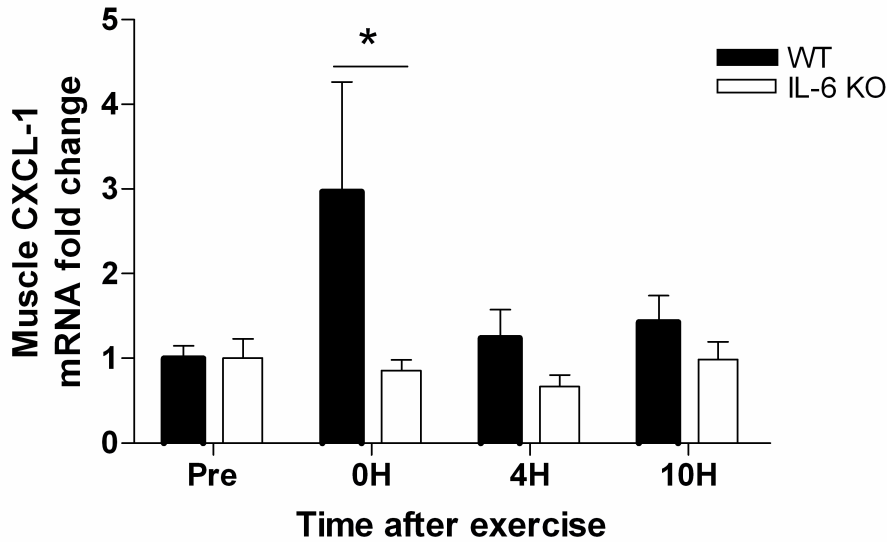

**Supplemental Figure 1. Exercise-induced muscle CXCL-1 mRNA expression is inhibited in IL-6 knock out mice.** Muscle CXCL-1 mRNA expression was measured immediately (0h), four hours (4h) or ten hours (10h) after a single bout of exercise in WT and IL-6 knock out (KO) mice. The relative CXCL-1 mRNA expression is presented as fold change values proportional to the non-exercising control group (Pre). Data are depicted as means  $\pm$  S.E.M (N = 12). Statistical significance was tested by 2-way ANOVA with Bonferroni's post hoc test.

## Supplemental table 1

| CT values: | Tibialis       | Soleus         | Gastrocnemius  | Liver          | Spleen         | Vis. fat       | Sub. fat       | Kidney         | Heart          |
|------------|----------------|----------------|----------------|----------------|----------------|----------------|----------------|----------------|----------------|
| Pre (-1H)  | 29.4 $\pm$ 0.2 | 31.4 $\pm$ 0.4 | 31.9 $\pm$ 0.3 | 28.0 $\pm$ 0.2 | 30.9 $\pm$ 0.1 | 28.9 $\pm$ 0.3 | 29.7 $\pm$ 0.3 | 28.9 $\pm$ 0.3 | 28.2 $\pm$ 0.2 |
| 0H         | 27.2 $\pm$ 0.2 | 30.7 $\pm$ 0.2 | 30.2 $\pm$ 0.4 | 27.6 $\pm$ 0.3 | 29.9 $\pm$ 0.2 | 28.8 $\pm$ 0.5 | 29.8 $\pm$ 0.2 | 26.8 $\pm$ 0.3 | 27.3 $\pm$ 0.3 |
| 2H         | 28.5 $\pm$ 0.3 | 31.2 $\pm$ 0.4 | 31.6 $\pm$ 0.8 | 22.7 $\pm$ 0.4 | 30.8 $\pm$ 0.2 | 29.1 $\pm$ 0.3 | 28.4 $\pm$ 0.6 | 27.2 $\pm$ 0.4 | 28.3 $\pm$ 0.2 |
| 5H         | 31.7 $\pm$ 0.2 | 32.0 $\pm$ 0.4 | 32.0 $\pm$ 0.4 | 26.4 $\pm$ 0.3 | 31.1 $\pm$ 0.2 | 29.4 $\pm$ 0.3 | 29.6 $\pm$ 0.3 | 28.4 $\pm$ 0.1 | 26.6 $\pm$ 0.1 |

**Supplemental table 1.** Actual mRNA expression levels (CT- values) for the CXCL-1 during the swimming exercise trial in WT mice. Data are presented as Mean  $\pm$  SEM.
